# Supplementary material for: MLi2Ti6O14 (M = Sr, Ba, and Pb): new cathode materials for magnesium–lithium hybrid batteries
Source: Royal Society of Chemistry journal article supplement (doi:10.1039/c9dt03799c), 2019-01-01
Supplement: c9dt03799c1.pdf [file c9dt03799c1.pdf]

## Supporting Information

### **$MLi_2Ti_6O_{14}$ (M= Sr, Ba, and Pb): new cathode materials for magnesium-lithium hybrid batteries**

Caixia Zhu<sup>a</sup>, Yakun Tang<sup>a</sup>, Lang Liu<sup>\*a</sup>, Xiaohui Li<sup>a</sup>, Yang Gao<sup>a</sup>, Shasha Gao<sup>a</sup>, Yanna NuLi<sup>\*b</sup>

<sup>a</sup>Key Laboratory of Energy Materials Chemistry, Ministry of Education, Institute of Applied  
Chemistry, Xinjiang University, Urumqi 830046, Xinjiang, China

<sup>b</sup>School of Chemistry and Chemical Engineering, Shanghai Electrochemical Energy Devices  
Research Center, Shanghai Jiao Tong University, Shanghai 200240, China

\*E-mail: llyhs1973@sina.com, nlyn@sjtu.edu.cn

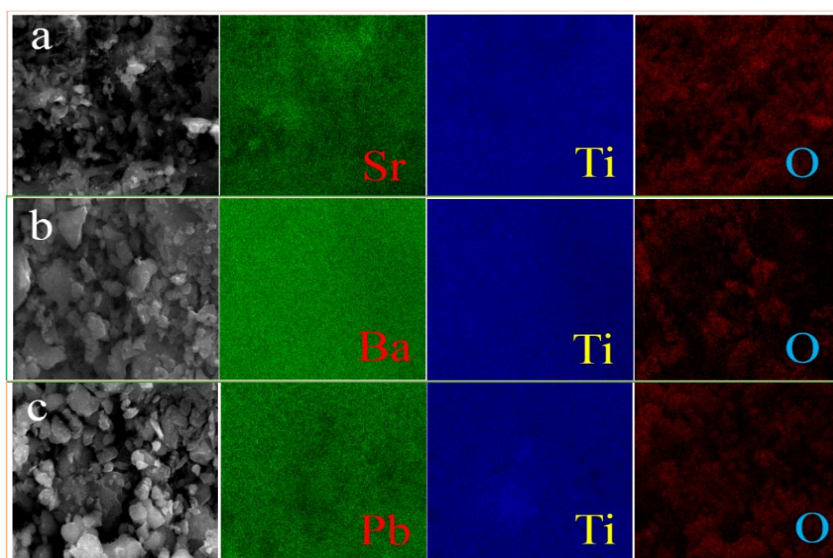

Fig. S1 SEM and element mapping images for  $\text{SrLi}_2\text{Ti}_6\text{O}_{14}$  (a),  $\text{BaLi}_2\text{Ti}_6\text{O}_{14}$  (b) and  $\text{PbLi}_2\text{Ti}_6\text{O}_{14}$  (c).

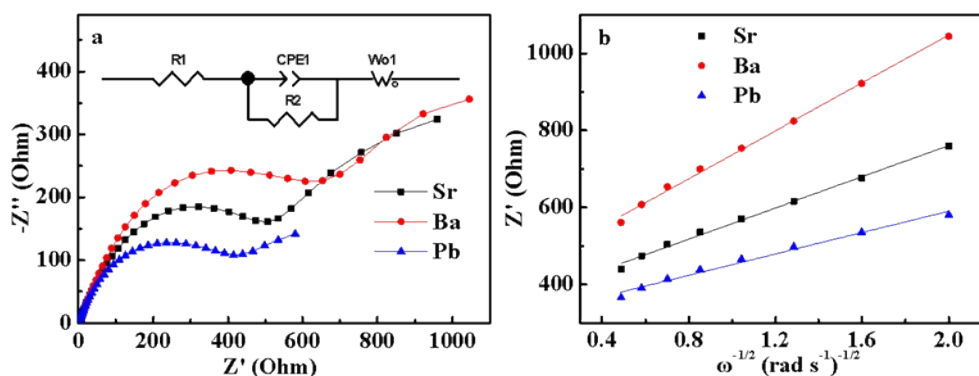

Fig. S2 (a) Electrochemical impedance spectra of  $\text{MLi}_2\text{Ti}_6\text{O}_{14}$  ( $M = \text{Sr}, \text{Ba}, \text{and Pb}$ ), (b) the relationship between the  $Z'$  and  $\omega^{-0.5}$  in low frequency region.

The electrochemical impedance spectroscopy measurement is used to evaluate the  $\text{Li}^+$  insertion/extraction kinetic process. All three samples display similar scatter curves with a semicircle in the high frequency region and a straight line in the low frequency region. All the curves can be fitted with the same equivalent circuit that presented in the insert pattern of Fig. S2a. In the equivalent circuit,  $R_1$  expresses the ohmic resistance and  $R_2$  indicates the charge transfer resistance between the active material and the electrolyte. It can be clearly observed that the charge transfer resistance for  $\text{PbLi}_2\text{Ti}_6\text{O}_{14}$  is smallest among all the electrodes, meaning  $\text{PbLi}_2\text{Ti}_6\text{O}_{14}$  has rapid charge transfer ability than  $\text{BaLi}_2\text{Ti}_6\text{O}_{14}$  and  $\text{SrLi}_2\text{Ti}_6\text{O}_{14}$  during cycles. Lithium ion diffusion

coefficients are calculated according the following equations:

$$D_{\text{Li}^+} = R^2 T^2 / 2 A^2 n^4 F^4 C^2 \sigma^2 \quad (1-1)$$

$$Z_{\text{re}} = R_s + R_{\text{ct}} + \sigma \omega^{-0.5} \quad (1-2)$$

In the two equations,  $R_s$ ,  $R_{\text{ct}}$ ,  $\omega$ ,  $R$ ,  $T$ ,  $n$ ,  $A$ ,  $F$  and  $C$  have fixed values, such as  $R$  (gas constant,  $8.314 \text{ J mol}^{-1} \text{ K}^{-1}$ ),  $T$  (absolute temperature,  $298 \text{ K}$ ),  $A$  (surface area of the electrode,  $1.13 \text{ cm}^2$ ),  $n$  (number of electrons transferred in the half-reaction for the redox couple),  $F$  (Faraday constant,  $96500 \text{ C mol}^{-1}$ ) and  $C$  (concentration of lithium ions in solid),  $\sigma$  is the Warburg factor, which are obtained from the slope of the lines in Fig. S2b. The  $\text{Li}^+$  diffusion coefficient of  $2.02 \times 10^{-13} \text{ cm}^2 \text{ s}^{-1}$  for  $\text{PbLi}_2\text{Ti}_6\text{O}_{14}$  is higher than the values of  $9.45 \times 10^{-14} \text{ cm}^2 \text{ s}^{-1}$  and  $4.0 \times 10^{-14} \text{ cm}^2 \text{ s}^{-1}$  for  $\text{SrLi}_2\text{Ti}_6\text{O}_{14}$  and  $\text{BaLi}_2\text{Ti}_6\text{O}_{14}$ , respectively.

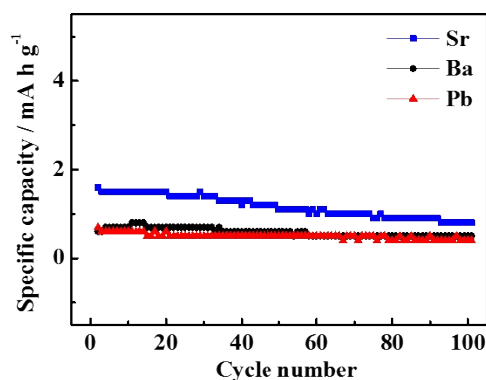

Fig. S3 Cycle performances of  $\text{MLi}_2\text{Ti}_6\text{O}_{14}$  ( $M = \text{Sr}, \text{Ba}, \text{and Pb}$ ) at the current density of  $50 \text{ mA g}^{-1}$  in the APC electrolyte.

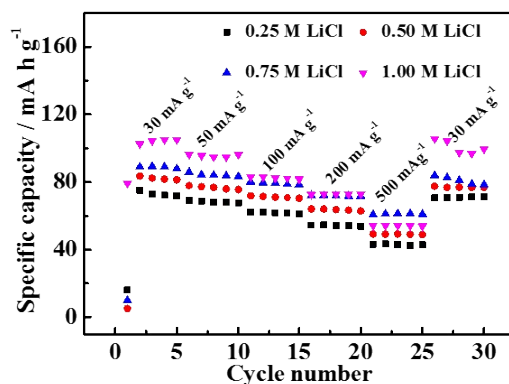

Fig. S4 Rate performances of  $\text{PbLi}_2\text{Ti}_6\text{O}_{14}$  in different electrolytes.
